# Supplementary material for: Seroprevalence and Risk Factors of Brucella Infection in Dairy Animals in Urban and Rural Areas of Bihar and Assam, India
Source: MDPI journal article supplement (doi:10.3390/microorganisms9040783), 2021-04-09
Supplement: s1 [file s1]

*Supplementary materials:*

**Table S1: List of all the variables studied to assess risk factors of Brucella-infection with their particulars and our decision on using it for multivariable analysis**

| Variables                                    | Description of the variables | Sero- positive/ total (%) | Coefficient of unconditional association with Brucella sero-positivity | p-value of association | Missing value | Kept for multivariable model |
|----------------------------------------------|------------------------------|---------------------------|------------------------------------------------------------------------|------------------------|---------------|------------------------------|
| <b>Outcome</b>                               |                              |                           |                                                                        |                        |               |                              |
| ELISA results of Brucella-infection          | Positive                     | 58                        |                                                                        |                        | 13            |                              |
|                                              | Negative                     | 306                       |                                                                        |                        |               |                              |
| <b>Identifiers</b>                           |                              |                           |                                                                        |                        |               |                              |
| Districts                                    | Kamrup (large farms)         | 49/135 (18.9)             | Ref.                                                                   | <0.001                 | 0             | Yes                          |
|                                              | Kamrup (small farms)         | 3/41(7.3)                 | -2.19                                                                  |                        |               |                              |
|                                              | Golaghat                     | 2/96(2.1)                 | -2.77                                                                  |                        |               |                              |
|                                              | Baska                        | 4/92(4.3)                 | -3.55                                                                  |                        |               |                              |
| <b>Farm Characteristics (FC)</b>             |                              |                           |                                                                        |                        |               |                              |
| Location of the farm in rural or urban areas | Rural CDB                    | 20/161(12.4)              | Ref.                                                                   | 0.16                   | 0             | Yes                          |
|                                              | Urban CDB                    | 38/203(18.7)              | 0.43                                                                   |                        |               |                              |
| Category of farms                            | Small (1-3 dairy animal),    | 8/223(3.6)                | Ref.                                                                   | <0.001                 | 0             | Yes                          |
|                                              | Medium (4-10 dairy animals)  | 19/81(23.4)               | 2.19                                                                   |                        |               |                              |
|                                              | Large (>10 dairy animals)    | 31/60(51.7)               | 3.58                                                                   |                        |               |                              |
| Dairy animals in contact with goat           | Yes                          | 9/106(8.5)                | -1.19                                                                  | 0.03                   | 0             | Yes                          |
|                                              | No                           | 49/258(19.0)              | Ref.                                                                   |                        |               |                              |
| Type of floor                                | Concrete                     | 20/67(29.8)               | Ref.                                                                   | <0.001                 | 0             | Yes                          |
|                                              | Earthen                      | 9/202(4.4)                | -2.42                                                                  |                        |               |                              |
|                                              | Others                       | 29/95(30.5)               | 0.10                                                                   |                        |               |                              |
| System of rearing                            | Fully stallfed               | 50/155(32.2)              | 2.48                                                                   | <0.001                 | 0             | No                           |
|                                              | Partly stallfed              | 8/209(3.8)                | Ref.                                                                   |                        |               |                              |
| Dairy animal in contact with pig             | Yes                          | 2/14(14.3)                | -0.13                                                                  | 0.86                   | 0             | No                           |
|                                              | No                           | 56/350(16.0)              | Ref.                                                                   |                        |               |                              |
| Dairy animal in contact with dog             | Yes                          | 33/216(15.3)              | -0.12                                                                  | 0.68                   | 0             | No                           |
|                                              | No                           | 25/148(16.9)              | Ref.                                                                   |                        |               |                              |
| Dairy animal in contact with wild animal     | Yes                          | 25/159(15.7)              | -0.03                                                                  | 0.92                   | 0             | No                           |
|                                              | No                           | 33/205(16.1)              | Ref.                                                                   |                        |               |                              |
| Type of roof                                 | Thatch                       | 9/46(19.6)                | 0.19                                                                   | 0.49                   | 77            | No                           |
|                                              | Corrugated asbestos          | Tin/ 28/233(12.0)         | 0.12                                                                   |                        |               |                              |

|                                            |                       |              |       |        |     |     |
|--------------------------------------------|-----------------------|--------------|-------|--------|-----|-----|
|                                            | Others                | 2/18(11.1)   | Ref.  |        |     |     |
| Source of introduction                     | Known source          | 19/67(28.3)  | 0.17  | 0.80   | 285 | No  |
|                                            | Unknown source        | 3/12(25.0)   | Ref.  |        |     |     |
| <b>Farm Management (FM)</b>                |                       |              |       |        |     |     |
| Adoption of AI                             | Yes                   | 46/225(20.4) | 1.16  | 0.02   | 0   | Yes |
|                                            | No                    | 12/139(8.6)  | Ref.  |        |     |     |
| Introduction of new animals                | Introduced            | 22/79(27.8)  | 1.54  | 0.006  | 0   | Yes |
|                                            | Not introduced        | 36/285(12.6) | Ref.  |        |     |     |
| Movement of animal                         | Animal moved          | 9/213(4.2)   | -2.67 | <0.001 | 0   | Yes |
|                                            | Not moved             | 49/151(32.4) | Ref.  |        |     |     |
| Use of disinfectant in cleaning farms      | Used disinfectant,    | 35/160(21.9) | 1.06  | 0.02   | 0   | Yes |
|                                            | Not used disinfectant | 23/204(11.3) | Ref.  |        |     |     |
| Quarantine of newly purchased animal       | Yes                   | 0/9          | 0     | 0      | 0   | No  |
|                                            | No                    | 58/355(16.3) |       |        |     |     |
| Purchase of sick animal                    | Yes                   | 4/18(22.2)   | 0.43  | 0.47   | 0   | No  |
|                                            | No                    | 54/346(15.6) | Ref.  |        |     |     |
| Purchase of weak but cheap animal          | Yes                   | 3/10(30.0)   | 0.84  | 0.26   | 0   | No  |
|                                            | No                    | 55/354(15.5) | Ref.  |        |     |     |
| Vaccination (against any disease) followed | Yes                   | 46/150(30.7) | 2.01  | <0.001 | 0   | No  |
|                                            | No                    | 12/214(5.6)  | Ref.  |        |     |     |
| Cleanliness of animal                      | Very clean            | 20/118(16.9) | Ref.  | 0.73   | 0   | No  |
|                                            | Clean                 | 38/244(15.6) | -0.10 |        |     |     |
|                                            | Dirty                 | 0/2          | 0     |        |     |     |
| Aborted material buried                    | Yes                   | 28/70(40.0)  | 1.20  | 0.23   | 288 | No  |
|                                            | No                    | 1/6(16.7)    | Ref.  |        |     |     |
| <b>Producers Demographic (PD)</b>          |                       |              |       |        |     |     |
| Education of farmers                       | No education          | 17/66(25.7)  | Ref.  | 0.14   | 0   | Yes |
|                                            | Class I-V             | 11/49(22.4)  | -0.15 |        |     |     |
|                                            | Class VI-X            | 18/149(12.1) | -1.16 |        |     |     |
|                                            | Class XI and above    | 12/100(12.0) | -1.13 |        |     |     |
| Age of farmers                             | 20-40 years           | 21/89(23.6)  | Ref.  | 0.10   | 0   | Yes |
|                                            | 41-60 years           | 26/191(13.6) | -1.15 |        |     |     |
|                                            | 60 years and above    | 11/84(13.1)  | -1.15 |        |     |     |
| Training availed by farmers                | Availed               | 15/50 (30.0) | 1.52  | 0.02   | 0   | Yes |
|                                            | Not availed           | 43/314(13.7) | Ref.  |        |     |     |
| Interaction had with the veterinarians     | Had interaction       | 55/297(18.5) | 1.85  | 0.005  | 0   | Yes |
|                                            | No interaction        | 3/67(4.5)    | Ref.  |        |     |     |
| Gender of farmer                           | Male                  | 58/351(16.5) | 0     | 0      | 0   | No  |
|                                            | Female                | 0/13         |       |        |     |     |

| Cow Demographic (CD) |                             |              |      |        |    |     |
|----------------------|-----------------------------|--------------|------|--------|----|-----|
| Breed of animal      | Non-descript indigenous     | 7/178(3.9)   | Ref. | <0.001 | 13 | Yes |
|                      | Improved/CB/pure            | 51/186(27.4) | 2.66 |        |    |     |
| Age of animals       | With Brucella sero-positive | 6.83±0.33    | 0.12 | 0.03   | 13 | Yes |
|                      | With Brucella sero-negative | 6.09±0.13    | Ref. |        |    |     |
| No. of lactation     | With Brucella sero-positive | 3.24±0.23    | 0.23 | 0.009  | 0  | No  |
|                      | With Brucella sero-negative | 2.64±0.09    | Ref. |        |    |     |
| Species of animal    | Cattle                      | 58/364       | 0    | 0      | 0  | No  |
|                      | Buffalo                     | 0            |      |        |    |     |
